# Supplementary material
Source: ML conference proceedings conference paper supplement (https://aclanthology.org/D19-1224)
Supplement: Attachment [file D19-1224.Attachment.zip]

## A EMNLP 2018 Checklist Survey

| Checklist item                          | Percentage of EMNLP 2018 papers |
|-----------------------------------------|---------------------------------|
| Reports train/validation/test splits    | 92%                             |
| Reports best hyperparameter assignments | 74%                             |
| Reports code                            | 30%                             |
| Reports dev accuracy                    | 24%                             |
| Reports computing infrastructure        | 18%                             |
| Reports empirical runtime               | 14%                             |
| Reports search strategy                 | 14%                             |
| Reports score distribution              | 10%                             |
| Reports number of hyperparameter trials | 10%                             |
| Reports hyperparameter search bounds    | 8%                              |

Table 1: Presence of checklist items from §5 across 50 randomly sampled EMNLP 2018 papers that involved modeling experiments.

## B Hyperparameter Search Spaces for Section 4.2

| <b>Computing infrastructure</b>          | GeForce GTX 1080 GPU                                                                            |                        |
|------------------------------------------|-------------------------------------------------------------------------------------------------|------------------------|
| <b>Number of search trials</b>           | 50                                                                                              |                        |
| <b>Search strategy</b>                   | uniform sampling                                                                                |                        |
| <b>Best validation accuracy</b>          | 40.5                                                                                            |                        |
| <b>Training duration</b>                 | 39 sec                                                                                          |                        |
| <b>Model implementation</b>              | <a href="http://github.com/allenai/show-your-work">http://github.com/allenai/show-your-work</a> |                        |
| <b>Hyperparameter</b>                    | <b>Search space</b>                                                                             | <b>Best assignment</b> |
| number of epochs                         | 50                                                                                              | 50                     |
| patience                                 | 10                                                                                              | 10                     |
| batch size                               | 64                                                                                              | 64                     |
| embedding                                | GloVe (50 dim)                                                                                  | GloVe (50 dim)         |
| encoder                                  | ConvNet                                                                                         | ConvNet                |
| max filter size                          | <i>uniform-integer</i> [3, 6]                                                                   | 4                      |
| number of filters                        | <i>uniform-integer</i> [64, 512]                                                                | 332                    |
| dropout                                  | <i>uniform-float</i> [0, 0.5]                                                                   | 0.4                    |
| learning rate scheduler                  | reduce on plateau                                                                               | reduce on plateau      |
| learning rate scheduler patience         | 2 epochs                                                                                        | 2 epochs               |
| learning rate scheduler reduction factor | 0.5                                                                                             | 0.5                    |
| learning rate optimizer                  | Adam                                                                                            | Adam                   |
| learning rate                            | <i>loguniform-float</i> [1e-6, 1e-1]                                                            | 0.0008                 |

Table 2: SST (fine-grained) CNN classifier search space and best assignments.

|                                 |                                                                                                 |
|---------------------------------|-------------------------------------------------------------------------------------------------|
| <b>Computing Infrastructure</b> | 3.1 GHz Intel Core i7 CPU                                                                       |
| <b>Number of search trials</b>  | 50                                                                                              |
| <b>Search strategy</b>          | uniform sampling                                                                                |
| <b>Best validation accuracy</b> | 39.8                                                                                            |
| <b>Training duration</b>        | 1.56 seconds                                                                                    |
| <b>Model implementation</b>     | <a href="http://github.com/allenai/show-your-work">http://github.com/allenai/show-your-work</a> |

| <b>Hyperparameter</b> | <b>Search space</b>                       | <b>Best assignment</b> |
|-----------------------|-------------------------------------------|------------------------|
| penalty               | <i>choice</i> [L1, L2]                    | L2                     |
| no. of iter           | 100                                       | 100                    |
| solver                | liblinear                                 | liblinear              |
| regularization        | <i>uniform-float</i> [0, 1]               | 0.13                   |
| n-grams               | <i>choice</i> [(1, 2), (1, 2, 3), (2, 3)] | [1, 2]                 |
| stopwords             | <i>choice</i> [True, False]               | True                   |
| weight                | <i>choice</i> [tf, tf-idf, binary]        | binary                 |
| tolerance             | <i>loguniform-float</i> [10e-5, 10e-3]    | 0.00014                |

Table 3: SST (fine-grained) logistic regression search space and best assignments.

## C Hyperparameter Search Spaces for Section 4.3

|                                 |                                                                                                 |  |
|---------------------------------|-------------------------------------------------------------------------------------------------|--|
| <b>Computing Infrastructure</b> | GeForce GTX 1080 GPU                                                                            |  |
| <b>Number of search trials</b>  | 50                                                                                              |  |
| <b>Search strategy</b>          | uniform sampling                                                                                |  |
| <b>Best validation accuracy</b> | 87.6                                                                                            |  |
| <b>Training duration</b>        | 1624 sec                                                                                        |  |
| <b>Model implementation</b>     | <a href="http://github.com/allenai/show-your-work">http://github.com/allenai/show-your-work</a> |  |

  

| <b>Hyperparameter</b>                        | <b>Search space</b>                  | <b>Best assignment</b> |
|----------------------------------------------|--------------------------------------|------------------------|
| number of epochs                             | 50                                   | 50                     |
| patience                                     | 10                                   | 10                     |
| batch size                                   | 64                                   | 64                     |
| gradient norm                                | <i>uniform-float</i> [5, 10]         | 9.0                    |
| embedding dropout                            | <i>uniform-float</i> [0, 0.5]        | 0.3                    |
| number of pre-encode feedforward layers      | <i>choice</i> [1, 2, 3]              | 3                      |
| number of pre-encode feedforward hidden dims | <i>uniform-integer</i> [64, 512]     | 232                    |
| pre-encode feedforward activation            | <i>choice</i> [relu, tanh]           | tanh                   |
| pre-encode feedforward dropout               | <i>uniform-float</i> [0, 0.5]        | 0.0                    |
| encoder hidden size                          | <i>uniform-integer</i> [64, 512]     | 424                    |
| number of encoder layers                     | <i>choice</i> [1, 2, 3]              | 2                      |
| integrator hidden size                       | <i>uniform-integer</i> [64, 512]     | 337                    |
| number of integrator layers                  | <i>choice</i> [1, 2, 3]              | 3                      |
| integrator dropout                           | <i>uniform-float</i> [0, 0.5]        | 0.1                    |
| number of output layers                      | <i>choice</i> [1, 2, 3]              | 3                      |
| output hidden size                           | <i>uniform-integer</i> [64, 512]     | 384                    |
| output dropout                               | <i>uniform-float</i> [0, 0.5]        | 0.2                    |
| output pool sizes                            | <i>uniform-integer</i> [3, 7]        | 6                      |
| learning rate optimizer                      | Adam                                 | Adam                   |
| learning rate                                | <i>loguniform-float</i> [1e-6, 1e-1] | 0.0001                 |
| learning rate scheduler                      | reduce on plateau                    | reduce on plateau      |
| learning rate scheduler patience             | 2 epochs                             | 2 epochs               |
| learning rate scheduler reduction factor     | 0.5                                  | 0.5                    |

Table 4: SST (binary) BCN GloVe search space and best assignments.

|                                 |                                                                                                 |
|---------------------------------|-------------------------------------------------------------------------------------------------|
| <b>Computing Infrastructure</b> | GeForce GTX 1080 GPU                                                                            |
| <b>Number of search trials</b>  | 50                                                                                              |
| <b>Search strategy</b>          | uniform sampling                                                                                |
| <b>Best validation accuracy</b> | 91.4                                                                                            |
| <b>Training duration</b>        | 6815 sec                                                                                        |
| <b>Model implementation</b>     | <a href="http://github.com/allenai/show-your-work">http://github.com/allenai/show-your-work</a> |

| <b>Hyperparameter</b>                        | <b>Search space</b>                  | <b>Best assignment</b> |
|----------------------------------------------|--------------------------------------|------------------------|
| number of epochs                             | 50                                   | 50                     |
| patience                                     | 10                                   | 10                     |
| batch size                                   | 64                                   | 64                     |
| gradient norm                                | <i>uniform-float</i> [5, 10]         | 9.0                    |
| freeze ELMo                                  | True                                 | True                   |
| embedding dropout                            | <i>uniform-float</i> [0, 0.5]        | 0.3                    |
| number of pre-encode feedforward layers      | <i>choice</i> [1, 2, 3]              | 3                      |
| number of pre-encode feedforward hidden dims | <i>uniform-integer</i> [64, 512]     | 206                    |
| pre-encode feedforward activation            | <i>choice</i> [relu, tanh]           | relu                   |
| pre-encode feedforward dropout               | <i>uniform-float</i> [0, 0.5]        | 0.3                    |
| encoder hidden size                          | <i>uniform-integer</i> [64, 512]     | 93                     |
| number of encoder layers                     | <i>choice</i> [1, 2, 3]              | 1                      |
| integrator hidden size                       | <i>uniform-integer</i> [64, 512]     | 159                    |
| number of integrator layers                  | <i>choice</i> [1, 2, 3]              | 3                      |
| integrator dropout                           | <i>uniform-float</i> [0, 0.5]        | 0.4                    |
| number of output layers                      | <i>choice</i> [1, 2, 3]              | 1                      |
| output hidden size                           | <i>uniform-integer</i> [64, 512]     | 399                    |
| output dropout                               | <i>uniform-float</i> [0, 0.5]        | 0.4                    |
| output pool sizes                            | <i>uniform-integer</i> [3, 7]        | 6                      |
| learning rate optimizer                      | Adam                                 | Adam                   |
| learning rate                                | <i>loguniform-float</i> [1e-6, 1e-1] | 0.0008                 |
| use integrator output ELMo                   | <i>choice</i> [True, False]          | True                   |
| learning rate scheduler                      | reduce on plateau                    | reduce on plateau      |
| learning rate scheduler patience             | 2 epochs                             | 2 epochs               |
| learning rate scheduler reduction factor     | 0.5                                  | 0.5                    |

Table 5: SST (binary) BCN GLoVe + ELMo (frozen) search space and best assignments.

|                                 |                                                                                                 |
|---------------------------------|-------------------------------------------------------------------------------------------------|
| <b>Computing Infrastructure</b> | NVIDIA Titan Xp GPU                                                                             |
| <b>Number of search trials</b>  | 50                                                                                              |
| <b>Search strategy</b>          | uniform sampling                                                                                |
| <b>Best validation accuracy</b> | 92.2                                                                                            |
| <b>Training duration</b>        | 16071 sec                                                                                       |
| <b>Model implementation</b>     | <a href="http://github.com/allenai/show-your-work">http://github.com/allenai/show-your-work</a> |

| <b>Hyperparameter</b>                        | <b>Search space</b>                  | <b>Best assignment</b> |
|----------------------------------------------|--------------------------------------|------------------------|
| number of epochs                             | 50                                   | 50                     |
| patience                                     | 10                                   | 10                     |
| batch size                                   | 64                                   | 64                     |
| gradient norm                                | <i>uniform-float</i> [5, 10]         | 7.0                    |
| freeze ELMo                                  | False                                | False                  |
| embedding dropout                            | <i>uniform-float</i> [0, 0.5]        | 0.1                    |
| number of pre-encode feedforward layers      | <i>choice</i> [1, 2, 3]              | 3                      |
| number of pre-encode feedforward hidden dims | <i>uniform-integer</i> [64, 512]     | 285                    |
| pre-encode feedforward activation            | <i>choice</i> [relu, tanh]           | relu                   |
| pre-encode feedforward dropout               | <i>uniform-float</i> [0, 0.5]        | 0.3                    |
| encoder hidden size                          | <i>uniform-integer</i> [64, 512]     | 368                    |
| number of encoder layers                     | <i>choice</i> [1, 2, 3]              | 2                      |
| integrator hidden size                       | <i>uniform-integer</i> [64, 512]     | 475                    |
| number of integrator layers                  | <i>choice</i> [1, 2, 3]              | 3                      |
| integrator dropout                           | <i>uniform-float</i> [0, 0.5]        | 0.4                    |
| number of output layers                      | <i>choice</i> [1, 2, 3]              | 3                      |
| output hidden size                           | <i>uniform-integer</i> [64, 512]     | 362                    |
| output dropout                               | <i>uniform-float</i> [0, 0.5]        | 0.4                    |
| output pool sizes                            | <i>uniform-integer</i> [3, 7]        | 5                      |
| learning rate optimizer                      | Adam                                 | Adam                   |
| learning rate                                | <i>loguniform-float</i> [1e-6, 1e-1] | 2.1e-5                 |
| use integrator output ELMo                   | <i>choice</i> [True, False]          | True                   |
| learning rate scheduler                      | reduce on plateau                    | reduce on plateau      |
| learning rate scheduler patience             | 2 epochs                             | 2 epochs               |
| learning rate scheduler reduction factor     | 0.5                                  | 0.5                    |

Table 6: SST (binary) BCN GloVe + ELMo (fine-tuned) search space and best assignments.

## D Hyperparameter Search Spaces for Section 4.4

|                                 |                                                                                                 |  |
|---------------------------------|-------------------------------------------------------------------------------------------------|--|
| <b>Computing Infrastructure</b> | GeForce GTX 1080 GPU                                                                            |  |
| <b>Number of search trials</b>  | 100                                                                                             |  |
| <b>Search strategy</b>          | uniform sampling                                                                                |  |
| <b>Best validation accuracy</b> | 82.7                                                                                            |  |
| <b>Training duration</b>        | 339 sec                                                                                         |  |
| <b>Model implementation</b>     | <a href="http://github.com/allenai/show-your-work">http://github.com/allenai/show-your-work</a> |  |

  

| <b>Hyperparameter</b>                  | <b>Search space</b>                  | <b>Best assignment</b> |
|----------------------------------------|--------------------------------------|------------------------|
| number of epochs                       | 140                                  | 140                    |
| patience                               | 20                                   | 20                     |
| batch size                             | 64                                   | 64                     |
| gradient clip                          | <i>uniform-float</i> [5, 10]         | 5.28                   |
| embedding projection dim               | <i>uniform-integer</i> [64, 300]     | 78                     |
| number of attend feedforward layers    | <i>choice</i> [1, 2, 3]              | 1                      |
| attend feedforward hidden dims         | <i>uniform-integer</i> [64, 512]     | 336                    |
| attend feedforward activation          | <i>choice</i> [relu, tanh]           | tanh                   |
| attend feedforward dropout             | <i>uniform-float</i> [0, 0.5]        | 0.1                    |
| number of compare feedforward layers   | <i>choice</i> [1, 2, 3]              | 1                      |
| compare feedforward hidden dims        | <i>uniform-integer</i> [64, 512]     | 370                    |
| compare feedforward activation         | <i>choice</i> [relu, tanh]           | relu                   |
| compare feedforward dropout            | <i>uniform-float</i> [0, 0.5]        | 0.2                    |
| number of aggregate feedforward layers | <i>choice</i> [1, 2, 3]              | 2                      |
| aggregate feedforward hidden dims      | <i>uniform-integer</i> [64, 512]     | 370                    |
| aggregate feedforward activation       | <i>choice</i> [relu, tanh]           | relu                   |
| aggregate feedforward dropout          | <i>uniform-float</i> [0, 0.5]        | 0.1                    |
| learning rate optimizer                | Adagrad                              | Adagrad                |
| learning rate                          | <i>loguniform-float</i> [1e-6, 1e-1] | 0.009                  |

Table 7: SciTail DAM search space and best assignments.

| <b>Computing Infrastructure</b>          | GeForce GTX 1080 GPU                                                                            |                        |
|------------------------------------------|-------------------------------------------------------------------------------------------------|------------------------|
| <b>Number of search trials</b>           | 100                                                                                             |                        |
| <b>Search strategy</b>                   | uniform sampling                                                                                |                        |
| <b>Best validation accuracy</b>          | 82.8                                                                                            |                        |
| <b>Training duration</b>                 | 372 sec                                                                                         |                        |
| <b>Model implementation</b>              | <a href="http://github.com/allenai/show-your-work">http://github.com/allenai/show-your-work</a> |                        |
| <b>Hyperparameter</b>                    | <b>Search space</b>                                                                             | <b>Best assignment</b> |
| number of epochs                         | 75                                                                                              | 75                     |
| patience                                 | 5                                                                                               | 5                      |
| batch size                               | 64                                                                                              | 64                     |
| encoder hidden size                      | <i>uniform-integer</i> [64, 512]                                                                | 253                    |
| dropout                                  | <i>uniform-float</i> [0, 0.5]                                                                   | 0.28                   |
| number of encoder layers                 | <i>choice</i> [1, 2, 3]                                                                         | 1                      |
| number of projection feedforward layers  | <i>choice</i> [1, 2, 3]                                                                         | 2                      |
| projection feedforward hidden dims       | <i>uniform-integer</i> [64, 512]                                                                | 85                     |
| projection feedforward activation        | <i>choice</i> [relu, tanh]                                                                      | relu                   |
| number of inference encoder layers       | <i>choice</i> [1, 2, 3]                                                                         | 1                      |
| number of output feedforward layers      | <i>choice</i> [1, 2, 3]                                                                         | 2                      |
| output feedforward hidden dims           | <i>uniform-integer</i> [64, 512]                                                                | 432                    |
| output feedforward activation            | <i>choice</i> [relu, tanh]                                                                      | tanh                   |
| output feedforward dropout               | <i>uniform-float</i> [0, 0.5]                                                                   | 0.03                   |
| gradient norm                            | <i>uniform-float</i> [5, 10]                                                                    | 7.9                    |
| learning rate optimizer                  | Adam                                                                                            | Adam                   |
| learning rate                            | <i>loguniform-float</i> [1e-6, 1e-1]                                                            | 0.0004                 |
| learning rate scheduler                  | reduce on plateau                                                                               | reduce on plateau      |
| learning rate scheduler patience         | 0 epochs                                                                                        | 0 epochs               |
| learning rate scheduler reduction factor | 0.5                                                                                             | 0.5                    |
| learning rate scheduler mode             | max                                                                                             | max                    |

Table 8: SciTail ESIM search space and best assignments.



|                                 |                                                                                                 |
|---------------------------------|-------------------------------------------------------------------------------------------------|
| <b>Computing Infrastructure</b> | GeForce GTX 1080 GPU                                                                            |
| <b>Number of search trials</b>  | 100                                                                                             |
| <b>Search strategy</b>          | uniform sampling                                                                                |
| <b>Best validation accuracy</b> | 81.2                                                                                            |
| <b>Training duration</b>        | 137 sec                                                                                         |
| <b>Model implementation</b>     | <a href="http://github.com/allenai/show-your-work">http://github.com/allenai/show-your-work</a> |

| <b>Hyperparameter</b>         | <b>Search space</b>                  | <b>Best assignment</b> |
|-------------------------------|--------------------------------------|------------------------|
| number of epochs              | 140                                  | 140                    |
| patience                      | 20                                   | 20                     |
| batch size                    | 64                                   | 64                     |
| dropout                       | <i>uniform-float</i> [0, 0.5]        | 0.2                    |
| hidden size                   | <i>uniform-integer</i> [64, 512]     | 167                    |
| activation                    | <i>choice</i> [relu, tanh]           | tanh                   |
| number of layers              | <i>choice</i> [1, 2, 3]              | 3                      |
| gradient norm                 | <i>uniform-float</i> [5, 10]         | 6.8                    |
| learning rate optimizer       | Adam                                 | Adam                   |
| learning rate                 | <i>loguniform-float</i> [1e-6, 1e-1] | 0.01                   |
| learning rate scheduler       | exponential                          | exponential            |
| learning rate scheduler gamma | 0.5                                  | 0.5                    |

Table 9: SciTail n-gram baseline search space and best assignments.

|                                 |                                                                                                 |  |
|---------------------------------|-------------------------------------------------------------------------------------------------|--|
| <b>Computing Infrastructure</b> | GeForce GTX 1080 GPU                                                                            |  |
| <b>Number of search trials</b>  | 100                                                                                             |  |
| <b>Search strategy</b>          | uniform sampling                                                                                |  |
| <b>Best validation accuracy</b> | 81.2                                                                                            |  |
| <b>Training duration</b>        | 1015 sec                                                                                        |  |
| <b>Model implementation</b>     | <a href="http://github.com/allenai/show-your-work">http://github.com/allenai/show-your-work</a> |  |

  

| <b>Hyperparameter</b>               | <b>Search space</b>                  | <b>Best assignment</b> |
|-------------------------------------|--------------------------------------|------------------------|
| number of epochs                    | 140                                  | 140                    |
| patience                            | 20                                   | 20                     |
| batch size                          | 16                                   | 16                     |
| embedding projection dim            | <i>uniform-integer</i> [64, 300]     | 100                    |
| edge embedding size                 | <i>uniform-integer</i> [64, 512]     | 204                    |
| premise encoder hidden size         | <i>uniform-integer</i> [64, 512]     | 234                    |
| number of premise encoder layers    | <i>choice</i> [1, 2, 3]              | 2                      |
| premise encoder is bidirectional    | <i>choice</i> [True, False]          | True                   |
| number of phrase probability layers | <i>choice</i> [1, 2, 3]              | 2                      |
| phrase probability hidden dims      | <i>uniform-integer</i> [64, 512]     | 268                    |
| phrase probability dropout          | <i>uniform-float</i> [0, 0.5]        | 0.2                    |
| phrase probability activation       | <i>choice</i> [tanh, relu]           | tanh                   |
| number of edge probability layers   | <i>choice</i> [1, 2, 3]              | 1                      |
| edge probability dropout            | <i>uniform-float</i> [0, 0.5]        | 0.2                    |
| edge probability activation         | <i>choice</i> [tanh, relu]           | tanh                   |
| gradient norm                       | <i>uniform-float</i> [5, 10]         | 7.0                    |
| learning rate optimizer             | Adam                                 | Adam                   |
| learning rate                       | <i>loguniform-float</i> [1e-6, 1e-1] | 0.0006                 |
| learning rate scheduler             | exponential                          | exponential            |
| learning rate scheduler gamma       | 0.5                                  | 0.5                    |

Table 10: SciTail DGEM search space and best assignments.

| <b>Computing Infrastructure</b>          | GeForce GTX 1080 GPU                                                                            |                        |
|------------------------------------------|-------------------------------------------------------------------------------------------------|------------------------|
| <b>Number of search trials</b>           | 128                                                                                             |                        |
| <b>Search strategy</b>                   | uniform sampling                                                                                |                        |
| <b>Best validation EM</b>                | 68.2                                                                                            |                        |
| <b>Training duration</b>                 | 31617 sec                                                                                       |                        |
| <b>Model implementation</b>              | <a href="http://github.com/allenai/show-your-work">http://github.com/allenai/show-your-work</a> |                        |
| <b>Hyperparameter</b>                    | <b>Search space</b>                                                                             | <b>Best assignment</b> |
| number of epochs                         | 20                                                                                              | 20                     |
| patience                                 | 10                                                                                              | 10                     |
| batch size                               | 16                                                                                              | 16                     |
| token embedding                          | GloVe (100 dim)                                                                                 | GloVe (100 dim)        |
| gradient norm                            | <i>uniform-float</i> [5, 10]                                                                    | 6.5                    |
| dropout                                  | <i>uniform-float</i> [0, 0.5]                                                                   | 0.46                   |
| character embedding dim                  | <i>uniform-integer</i> [16, 64]                                                                 | 43                     |
| max character filter size                | <i>uniform-integer</i> [3, 6]                                                                   | 3                      |
| number of character filters              | <i>uniform-integer</i> [64, 512]                                                                | 33                     |
| character embedding dropout              | <i>uniform-float</i> [0, 0.5]                                                                   | 0.15                   |
| number of highway layers                 | <i>choice</i> [1, 2, 3]                                                                         | 3                      |
| phrase layer hidden size                 | <i>uniform-integer</i> [64, 512]                                                                | 122                    |
| number of phrase layers                  | <i>choice</i> [1, 2, 3]                                                                         | 1                      |
| phrase layer dropout                     | <i>uniform-float</i> [0, 0.5]                                                                   | 0.46                   |
| modeling layer hidden size               | <i>uniform-integer</i> [64, 512]                                                                | 423                    |
| number of modeling layers                | <i>choice</i> [1, 2, 3]                                                                         | 3                      |
| modeling layer dropout                   | <i>uniform-float</i> [0, 0.5]                                                                   | 0.32                   |
| span end encoder hidden size             | <i>uniform-integer</i> [64, 512]                                                                | 138                    |
| span end encoder number of layers        | <i>choice</i> [1, 2, 3]                                                                         | 1                      |
| span end encoder dropout                 | <i>uniform-float</i> [0, 0.5]                                                                   | 0.03                   |
| learning rate optimizer                  | Adam                                                                                            | Adam                   |
| learning rate                            | <i>loguniform-float</i> [1e-6, 1e-1]                                                            | 0.00056                |
| Adam $\beta_1$                           | <i>uniform-float</i> [0.9, 1.0]                                                                 | 0.95                   |
| Adam $\beta_2$                           | <i>uniform-float</i> [0.9, 1.0]                                                                 | 0.93                   |
| learning rate scheduler                  | reduce on plateau                                                                               | reduce on plateau      |
| learning rate scheduler patience         | 2 epochs                                                                                        | 2 epochs               |
| learning rate scheduler reduction factor | 0.5                                                                                             | 0.5                    |
| learning rate scheduler mode             | max                                                                                             | max                    |

Table 11: SQuAD BiDAF search space and best assignments.
